# Supplementary material for: In silico gene expression analysis reveals glycolysis and acetate anaplerosis in IDH1 wild-type glioma and lactate and glutamate anaplerosis in IDH1-mutated glioma
Source: PubMed Central journal article supplement (PMC5564758; doi:10.18632/oncotarget.17106), 2017-04-13
Supplement: oncotarget-08-49165-s001.pdf [file oncotarget-08-49165-s001.pdf]

## ***In silico* gene expression analysis reveals glycolysis and acetate anaplerosis in *IDH1* wild-type glioma and lactate and glutamate anaplerosis in *IDH1*-mutated glioma**

### Supplementary Materials

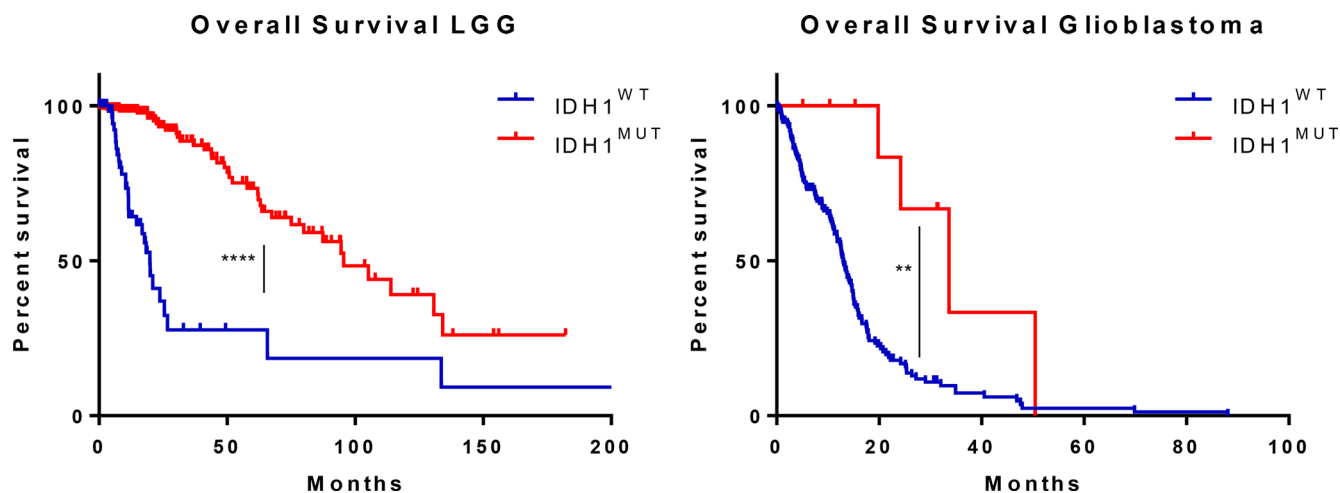

**Supplementary Figure 1: Survival curves comparing *IDH1*<sup>MUT</sup> and *IDH1*<sup>WT</sup> in LGG and glioblastoma patients in our created dataset.** 399 *IDH1*<sup>MUT</sup> versus 112 *IDH1*<sup>WT</sup> LGG and 157 *IDH1*<sup>WT</sup> versus 9 *IDH1*<sup>MUT</sup> glioblastoma patients. Kaplan–Meier estimates of survival with log-rank tests among strata.

**Supplementary Table 1: Selection of genes encoding for enzymes of the glycolytic pathway, TCA cycle, glutamine-glutamate cycle and acetate cycle**

| Enzyme                                 | Gene Symbol | GeneID |
|----------------------------------------|-------------|--------|
| Glucose transporter                    | SLC2A1      | 6513   |
|                                        | SLC2A2      | 6514   |
|                                        | SLC2A3      | 6515   |
| Hexokinase                             | HK1         | 3098   |
|                                        | HK2         | 3099   |
|                                        | HK3         | 3101   |
| Glucose-6-phosphate dehydrogenase      | G6PD        | 2539   |
| Pyruvate kinase                        | PKLR        | 5313   |
|                                        | PKM2        | 5315   |
| Lactate dehydrogenase                  | LDHA        | 3939   |
|                                        | LDHB        | 3945   |
| Monocarboxylate transporter            | SLC16A1     | 6566   |
|                                        | SLC16A3     | 9123   |
| Pyruvate dehydrogenase                 | PDHA1       | 5160   |
|                                        | PDHA2       | 5161   |
|                                        | PDHB        | 5162   |
|                                        | PDHX        | 8050   |
| Pyruvate dehydrogenase kinase          | PDK1        | 5163   |
|                                        | PDK2        | 5164   |
|                                        | PDK3        | 5165   |
| Citrate synthase                       | CS          | 1431   |
| Aconitase                              | ACO2        | 50     |
|                                        | ACO1        | 48     |
| Isocitrate dehydrogenase               | IDH1        | 3417   |
|                                        | IDH2        | 3418   |
|                                        | IDH3B       | 3420   |
|                                        | IDH3G       | 3421   |
|                                        | IDH3A       | 3419   |
| $\alpha$ -Ketoglutarate dehydrogenase  | OGDH        | 4967   |
| Succinate dehydrogenase                | SDHA        | 6389   |
|                                        | SDHB        | 6390   |
|                                        | SDHC        | 6391   |
|                                        | SDHD        | 6392   |
| Fumarate hydratase                     | FH          | 2271   |
| Malate dehydrogenase                   | MDH1        | 4190   |
|                                        | MDH2        | 4191   |
| Pyruvate carboxylase                   | PC          | 5091   |
| Phosphoenolpyruvate carboxykinase      | PCK1        | 5105   |
|                                        | PCK2        | 5106   |
| Acyl-CoA synthetase                    | ACSS1       | 84532  |
|                                        | ACSS2       | 55902  |
| Glutamate dehydrogenase                | GLUD1       | 2746   |
|                                        | GLUD2       | 2747   |
| Branched chain amino acid transaminase | BCAT1       | 586    |
|                                        | BCAT2       | 587    |
| Glutaminase                            | GLS         | 2744   |
|                                        | GLS2        | 27165  |
| Glutamate-ammonia ligase               | GLUL        | 2752   |

Gene symbol and GeneID were obtained from the Kyoto Encyclopedia of Genes and Genomes.
